# Supplementary material for: Design and process study of chiral separation of (2S,4S)-1-(tert-butoxy carbonyl)-4-(methoxymethyl) pyrrolidine-2-carboxylic acid for green manufacturing
Source: Royal Society of Chemistry journal article supplement (doi:10.1039/d3gc04435a), 2024-01-01
Supplement: d3gc04435a1.pdf [file d3gc04435a1.pdf]

## Supporting information

### Design and Process Study of Chiral Separation of (2*S*, 4*S*)-1-(*tert*-butoxy carbonyl)-4-(methoxymethyl) pyrrolidine-2-carboxylic acid for Green Manufacturing

Shuwang Ge,<sup>a</sup> Mingwei Fu,<sup>a, b</sup> Dihai Gu,<sup>a</sup> Lai Wei,<sup>a</sup> Kun Qian,<sup>d</sup> Qi Rui,<sup>b</sup> Yan Ma,<sup>b</sup> Liang Li,<sup>b</sup>

Huaiqiu Wang,<sup>b</sup> Lingchao Li,<sup>c</sup> Min Ge,<sup>b</sup> Yihong Wang,<sup>\*a</sup>

<sup>a</sup> School of Chemistry and Chemical Engineering, Southeast University, Nanjing 211189, P. R. China. Fax: +86 25 52090614, Tel: +86 25 52090614, E-mail address: yihongwang@seu.edu.cn

<sup>b</sup> Nanjing Zenji Research Laboratories, Nanjing 211800, P. R. China.

<sup>c</sup> Jiangsu Zenji Pharmaceuticals Ltd., Huaian 223100, P. R. China.

<sup>d</sup> Shanghai institute of Materia Medica. Chinese Academy of Sciences, Shanghai 201203, P. R. China.

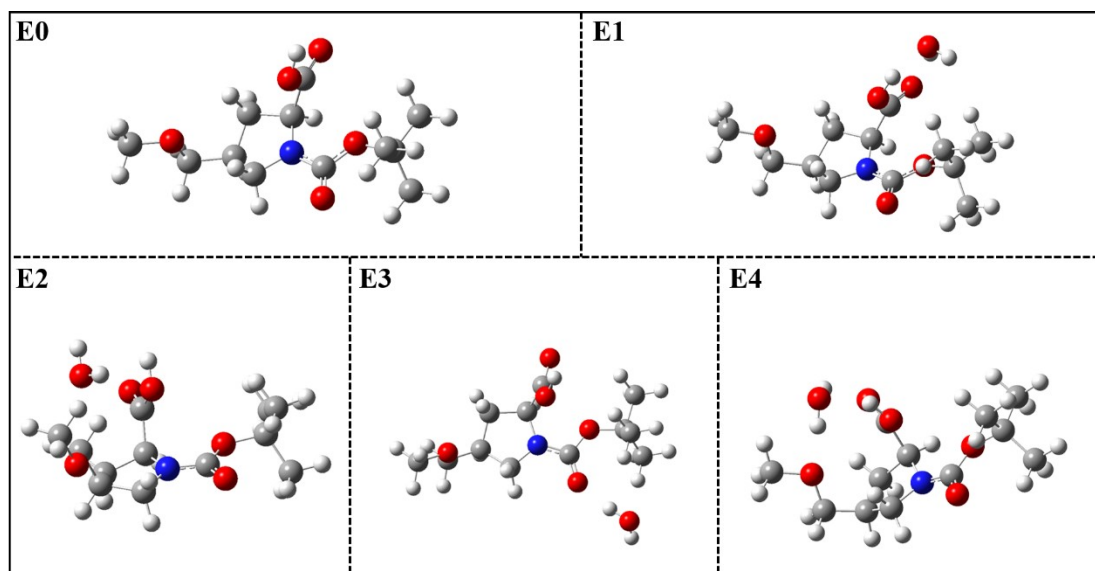

Fig S1. Hydrogen bonds of (2*S*, 4*S*)-TBMP with water at the different positions

**Table S1** The hydrogen bonding energy and distances of the (2*S*, 4*S*)-TBMP with water

| Energy             | E total energy (Hartee) | E correction (Hartee) | E total energy+ E correction (Hartee) | $\Delta E(\text{kcal/mol})$ | $D_{\text{H}\cdots\text{O}}(\text{\AA})$ |
|--------------------|-------------------------|-----------------------|---------------------------------------|-----------------------------|------------------------------------------|
| $E_0$              | -900.82462751           | 0.334076              | -900.4905991                          | /                           | /                                        |
| $E_{\text{water}}$ | -76.40895332            | 0.021168              | -76.38778532                          | /                           | /                                        |
| $E_1$              | -977.33313321           | 0.360512              | -976.97262121                         | -59.1345280929              | 1.739                                    |
| $E_2$              | -977.31975384           | 0.359007              | -976.96074684                         | -51.6832421742              | 1.932                                    |
| $E_3$              | -977.32076811           | 0.358917              | -976.96185111                         | -52.3761826419              | 1.846                                    |
| $E_4$              | -977.32941487           | 0.361285              | -976.96812987                         | -56.3161673295              | 2.085                                    |

$\Delta E(\text{kcal/mol}) = (E - E_{\text{water}} - E_0) * 627.51(\text{kcal/mol})$

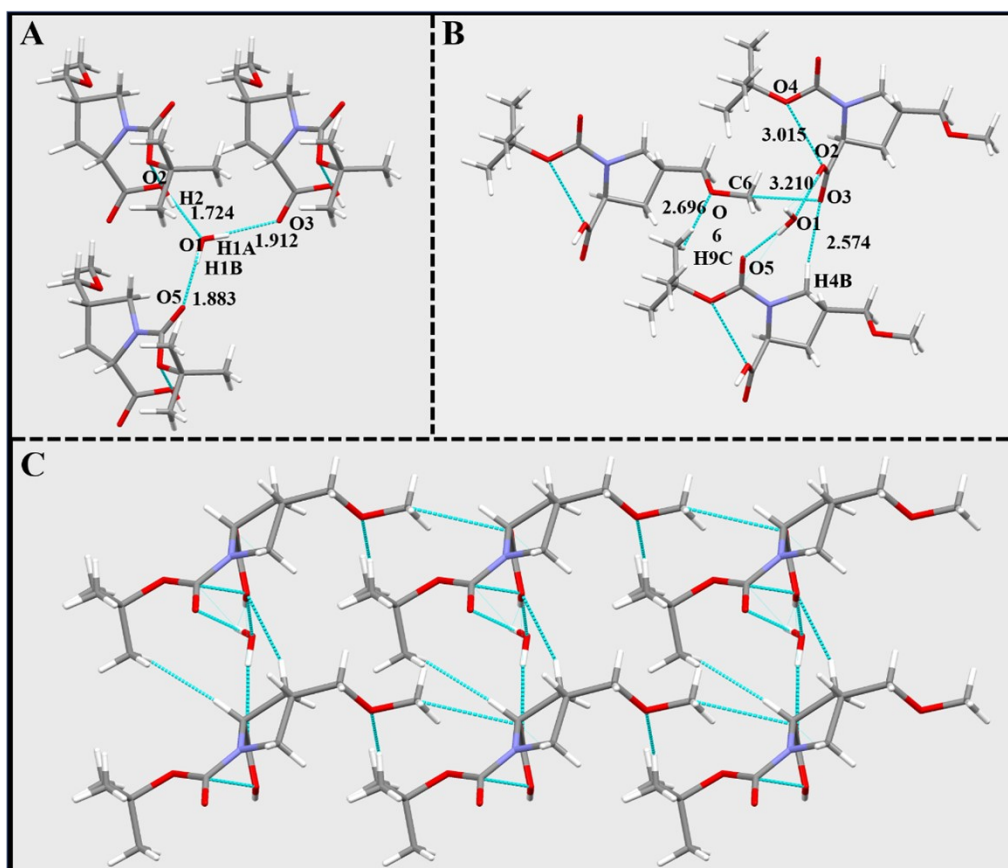

**Fig. S2** The map of hydrogen bonds of Crystal 1, C-grey, N-blue, O-red, H-off-white, **A)** and **B)** The distances of hydrogen bonds in the molecules of Crystal 1, **C)** Crystal 1 packing along the b-axis

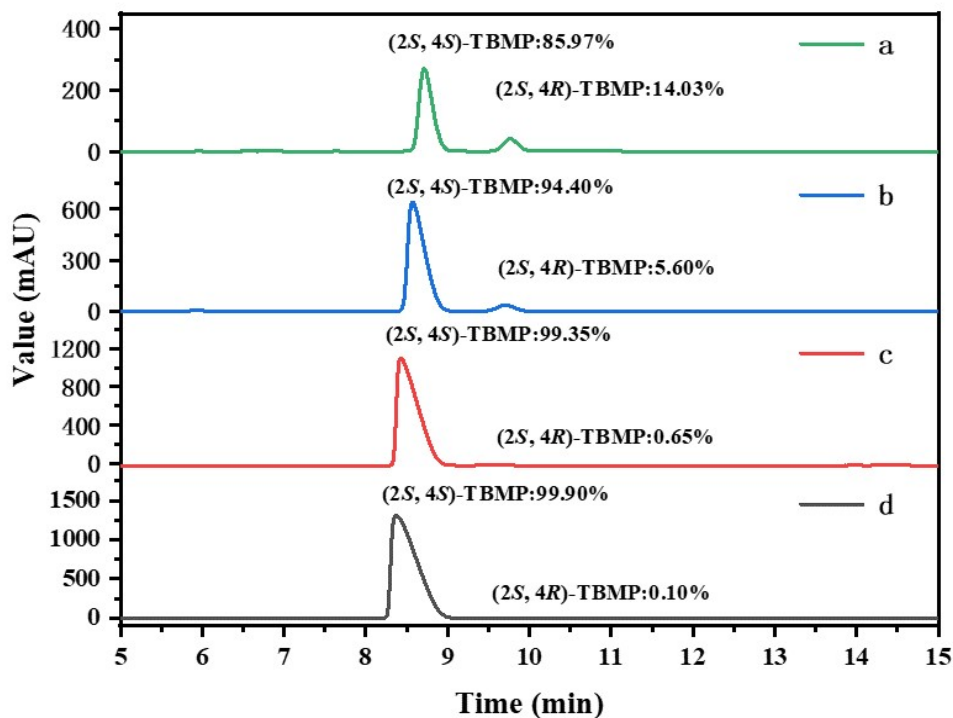

**Fig. S3** The HPLC curve of the first batch of (2*S*, 4*S*)-TBMP and (2*S*, 4*R*)-TBMP: a) initial raw material; b) the first crystallization product; c) the second crystallization product; d) the third crystallization product

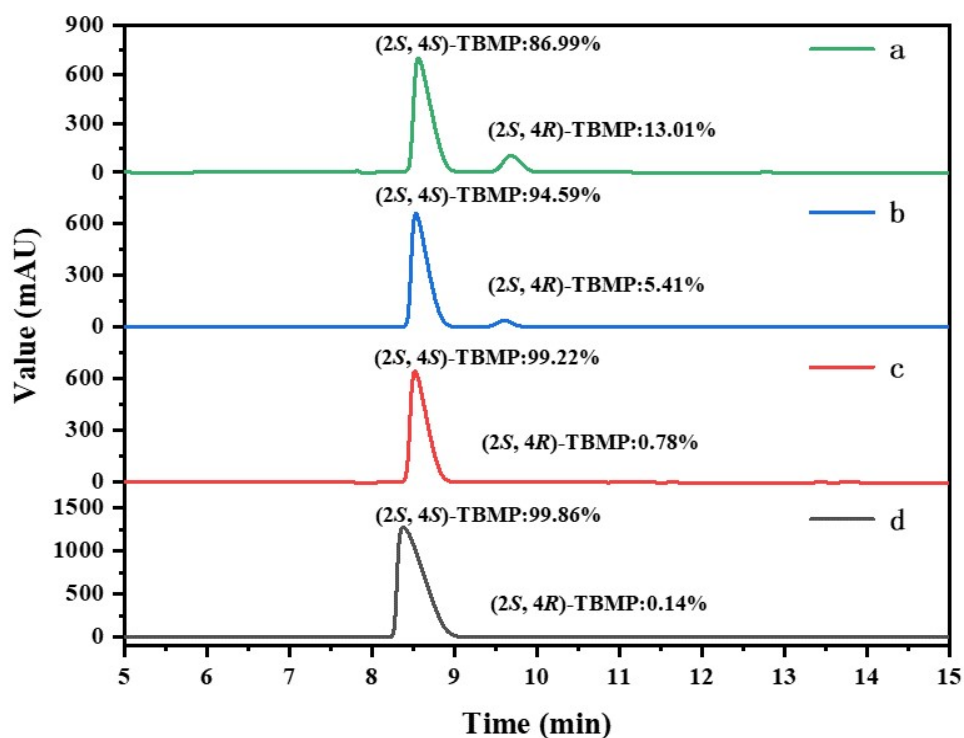

**Fig. S4** The HPLC curve of the second batch of (2*S*, 4*S*)-TBMP and (2*S*, 4*R*)-TBMP, a) initial raw material; b) the first crystallization product; c) the second crystallization product; d) the third crystallization product

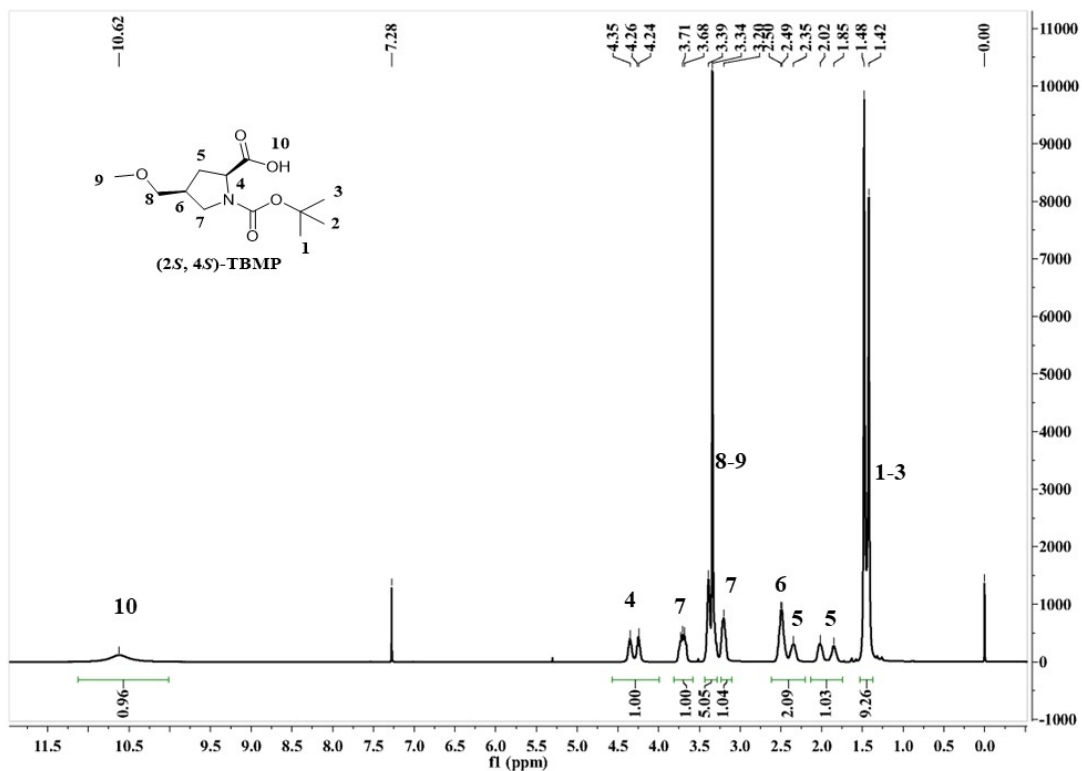

Fig. S5 The  $^1\text{H}$  NMR spectrum of (2*S*, 4*S*)-TBMP

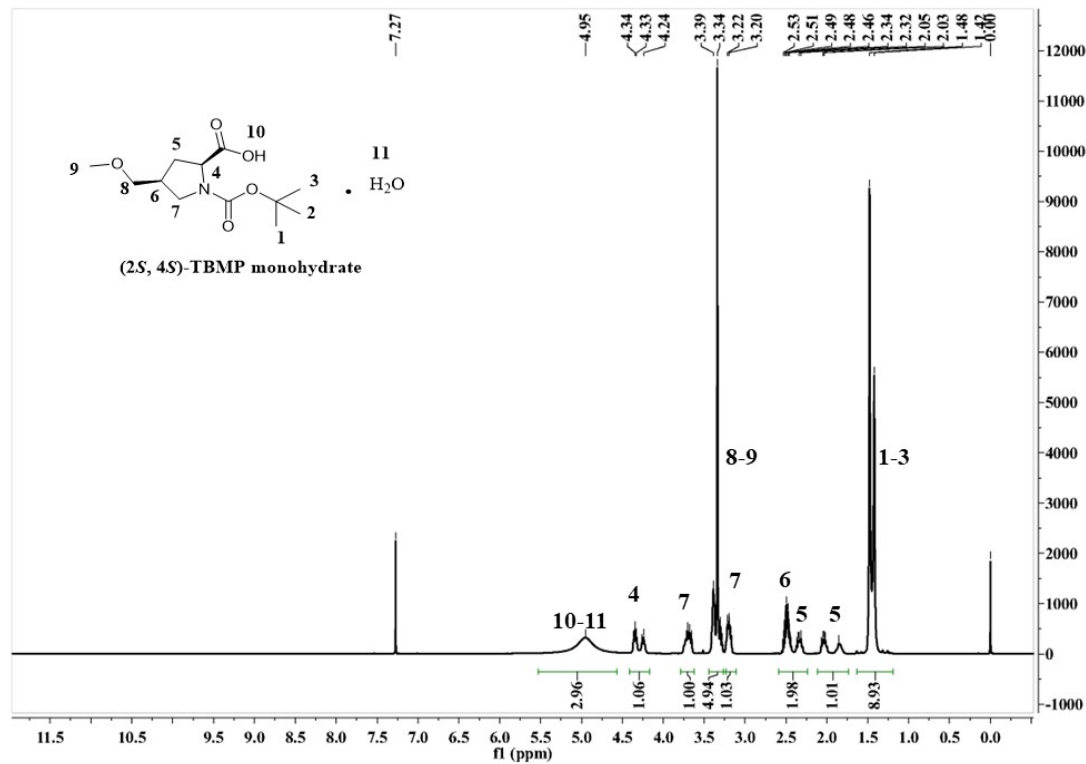

Fig. S6 The  $^1\text{H}$  NMR spectrum of (2*S*, 4*S*)-TBMP monohydrate

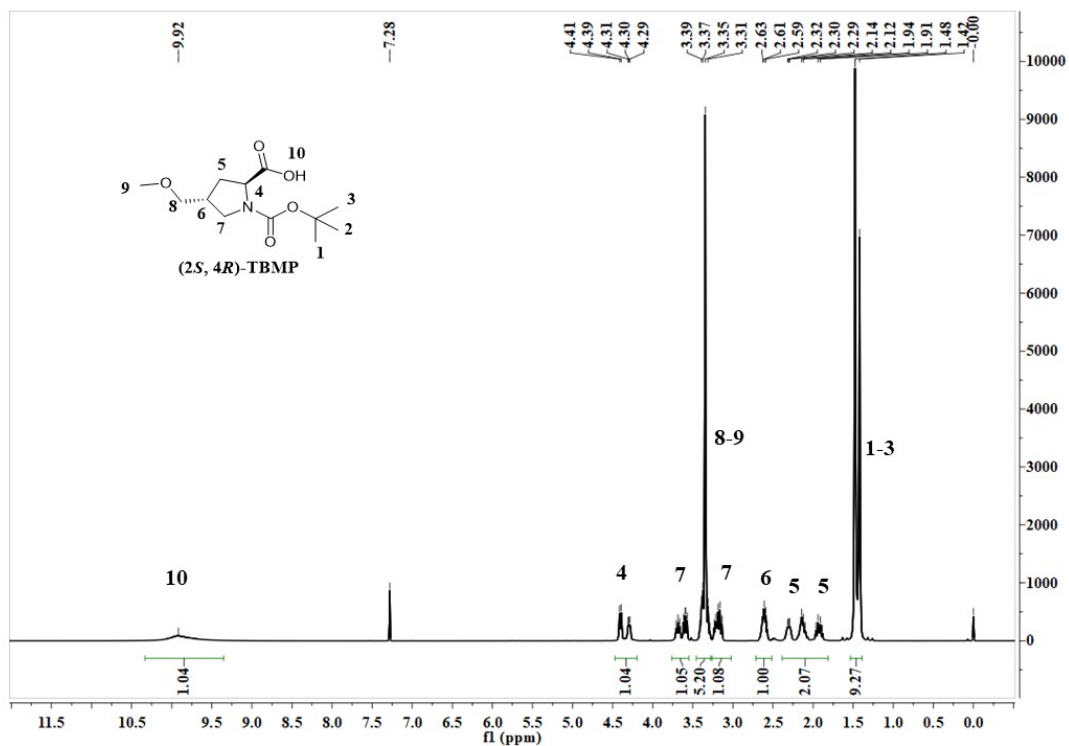

Fig. S7 The  $^1\text{H}$  NMR spectrum of (2*S*, 4*R*)-TBMP

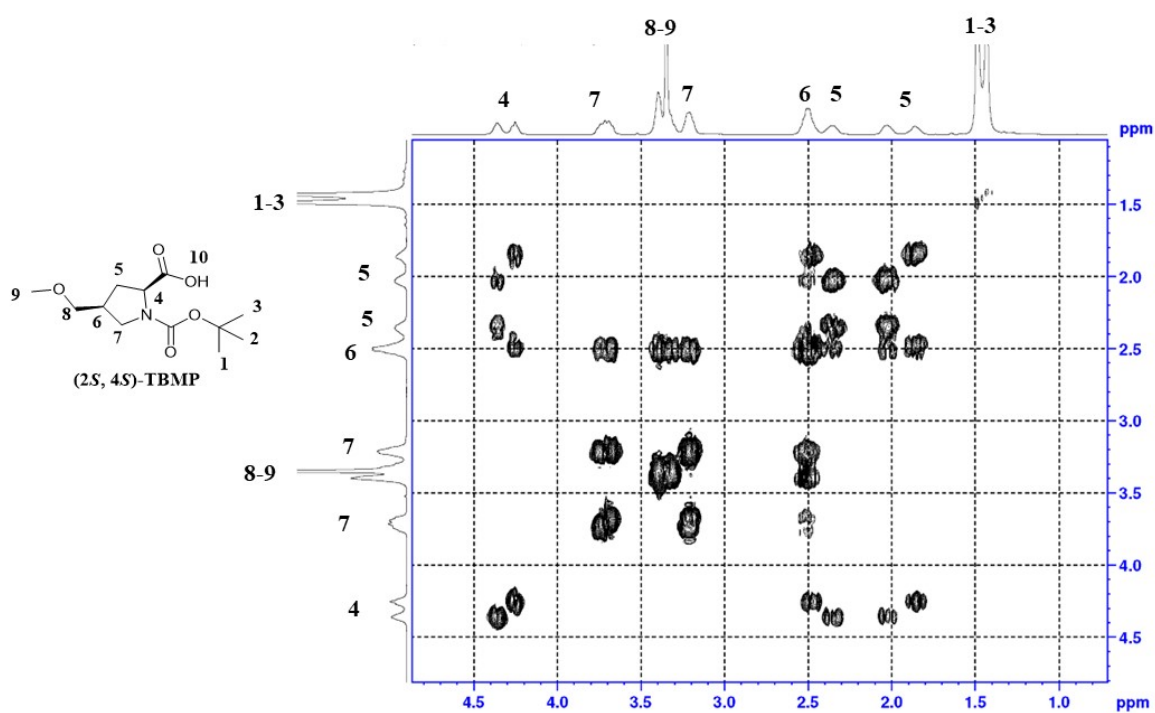

Fig. S8 The HSQC spectrum of (2*S*, 4*S*)-TBMP

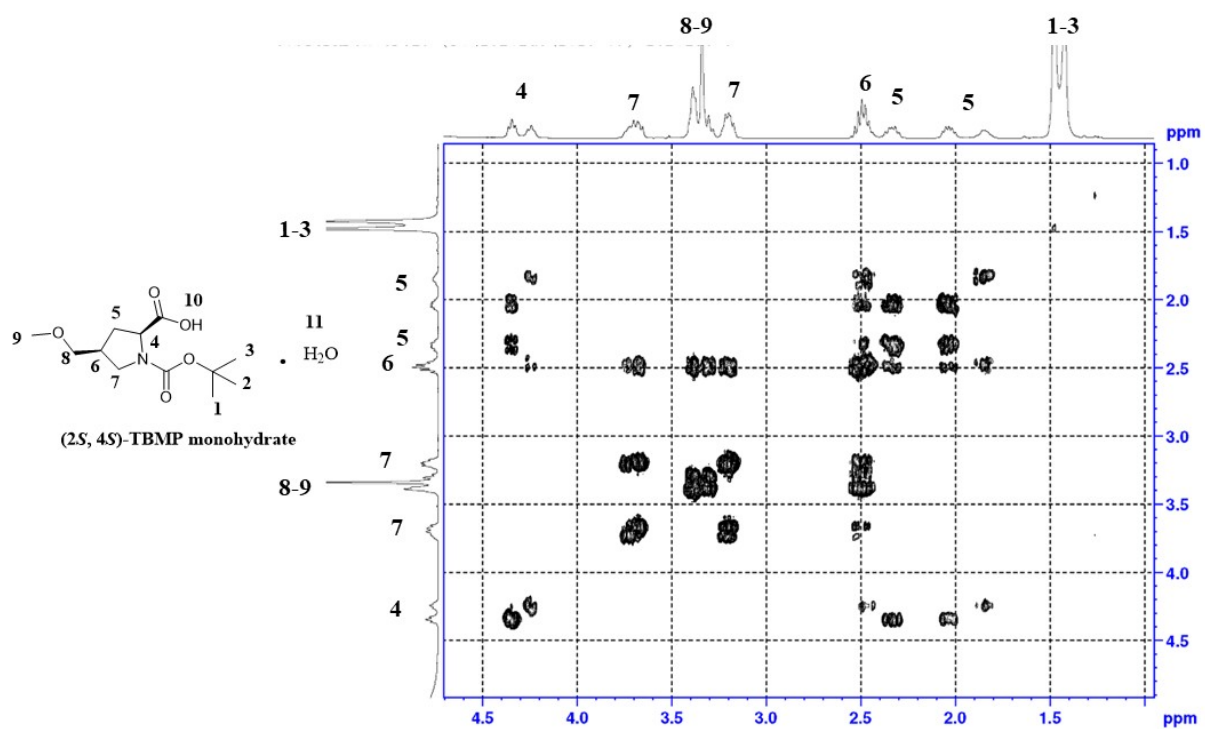

Fig. S9 The HSQC spectrum of (2*S*, 4*S*)-TBMP monohydrate

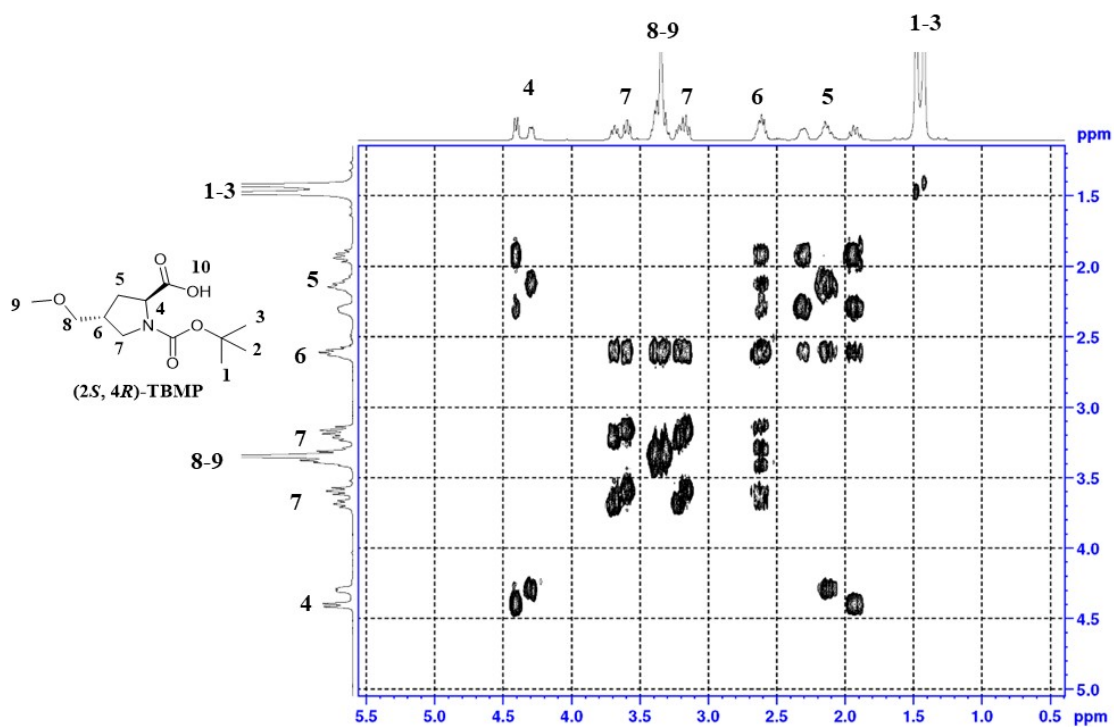

Fig. S10 The HSQC spectrum of (2*S*, 4*R*)-TBMP

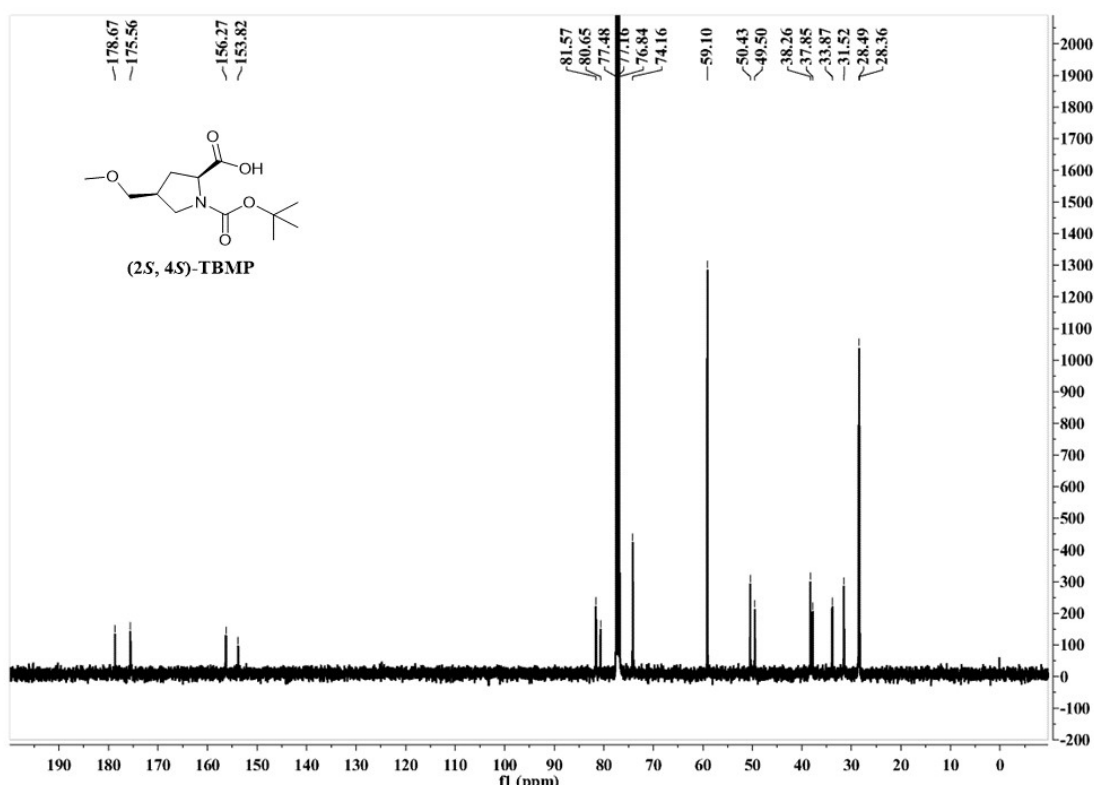

Fig. S11 The  $^{13}\text{C}$  NMR spectrum of (2*S*, 4*S*)-TBMP

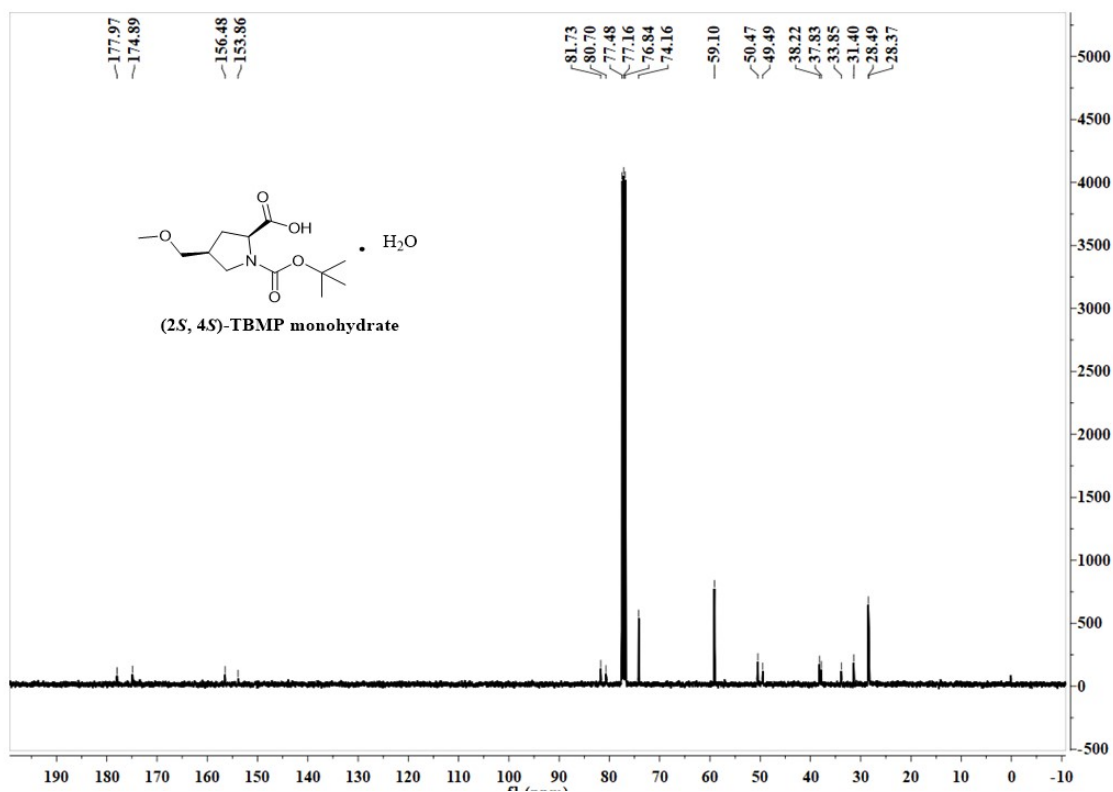

Fig. S12 The  $^{13}\text{C}$  NMR spectrum of (2*S*, 4*S*)-TBMP monohydrate



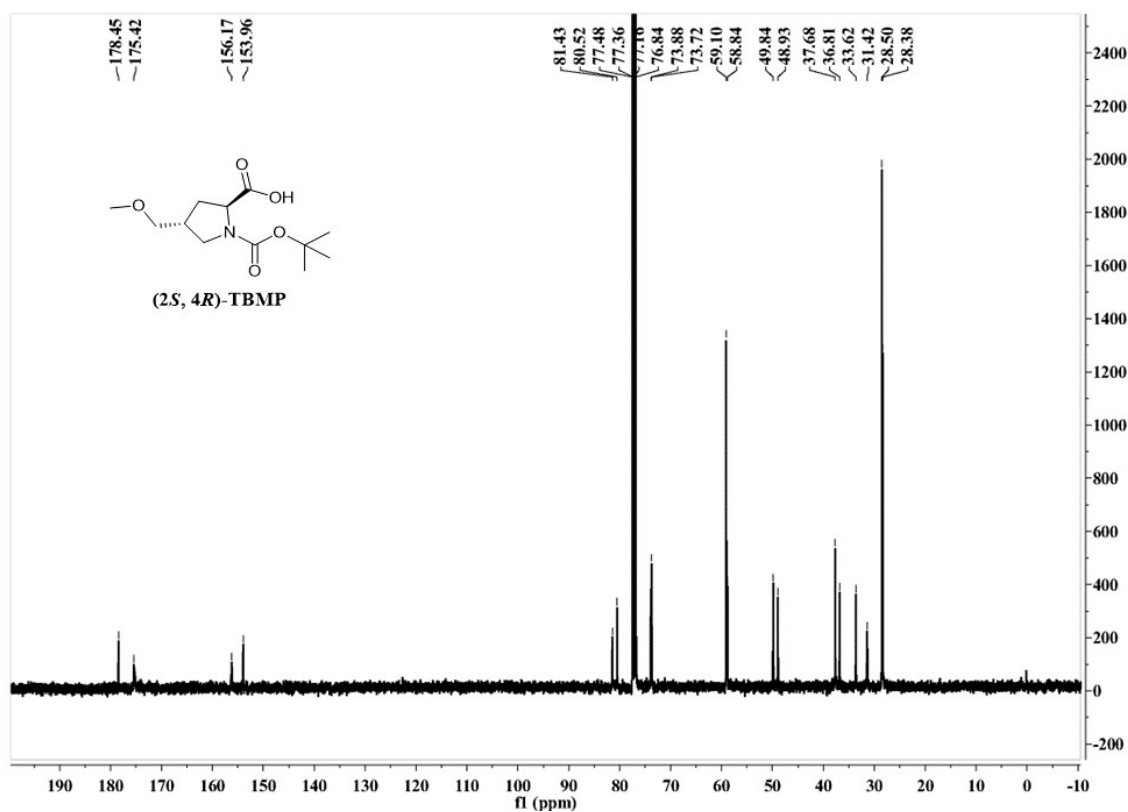

Fig. S13 The  $^{13}\text{C}$  NMR spectrum of (2*S*, 4*R*)-TBMP

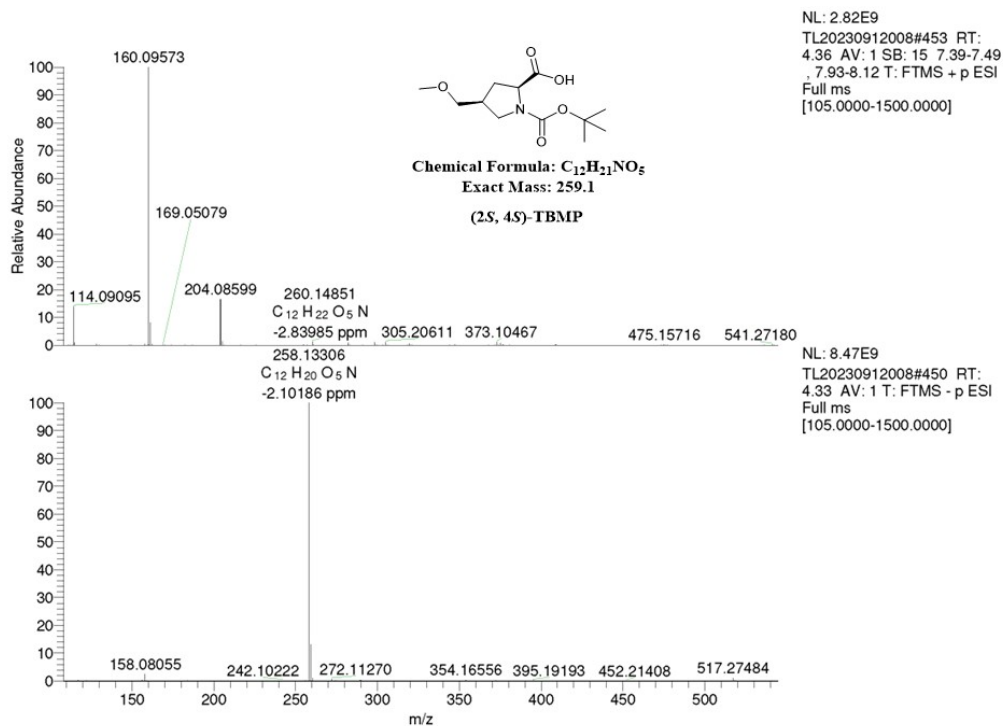

Fig. S14 The HRMS spectrum of (2*S*, 4*S*)-TBMP



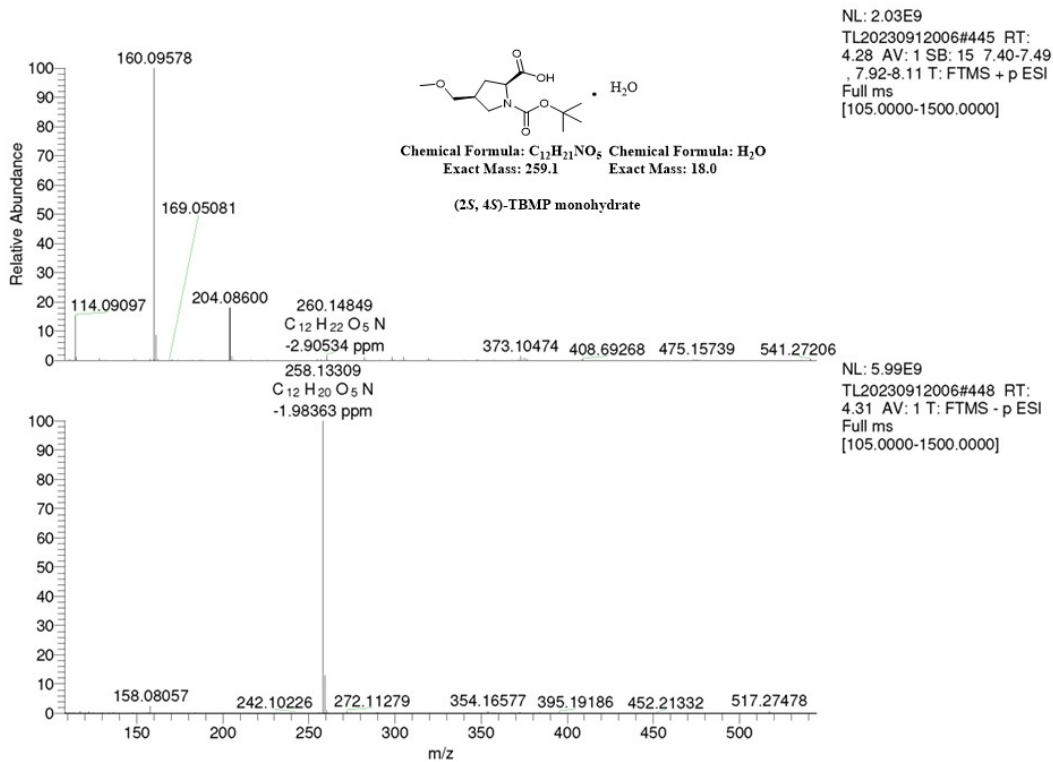

Fig. S15 The HRMS spectrum of (2*S*, 4*S*)-TBMP monohydrate

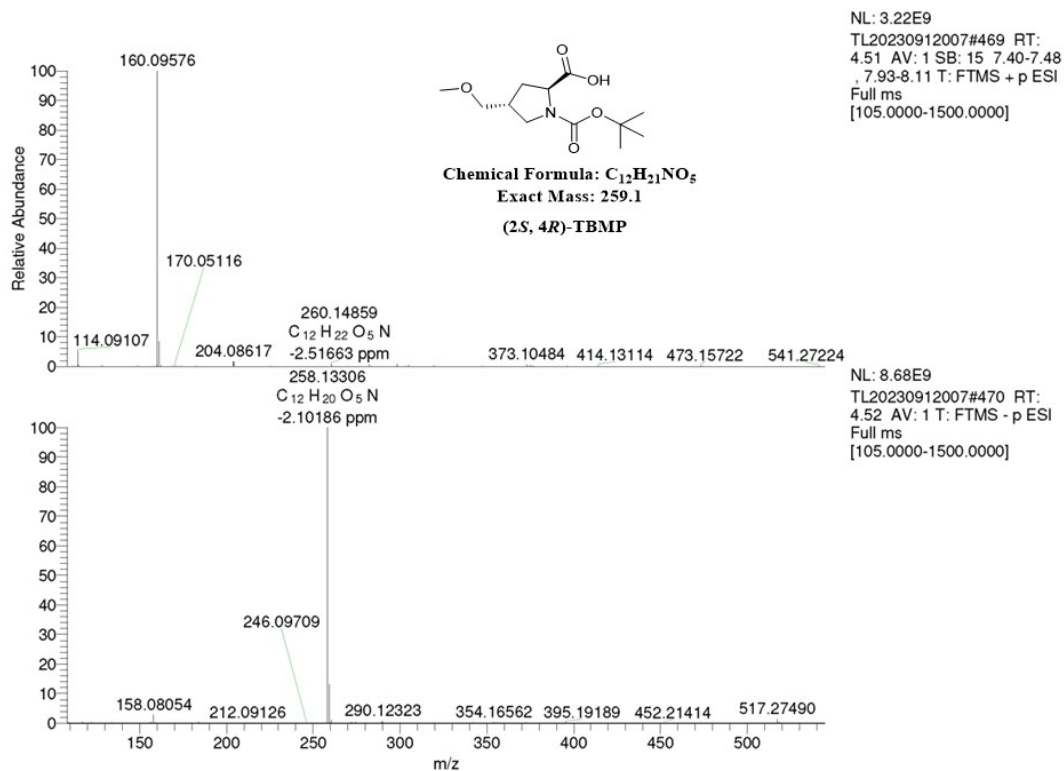

Fig. S16 The HRMS spectrum of (2*S*, 4*R*)-TBMP

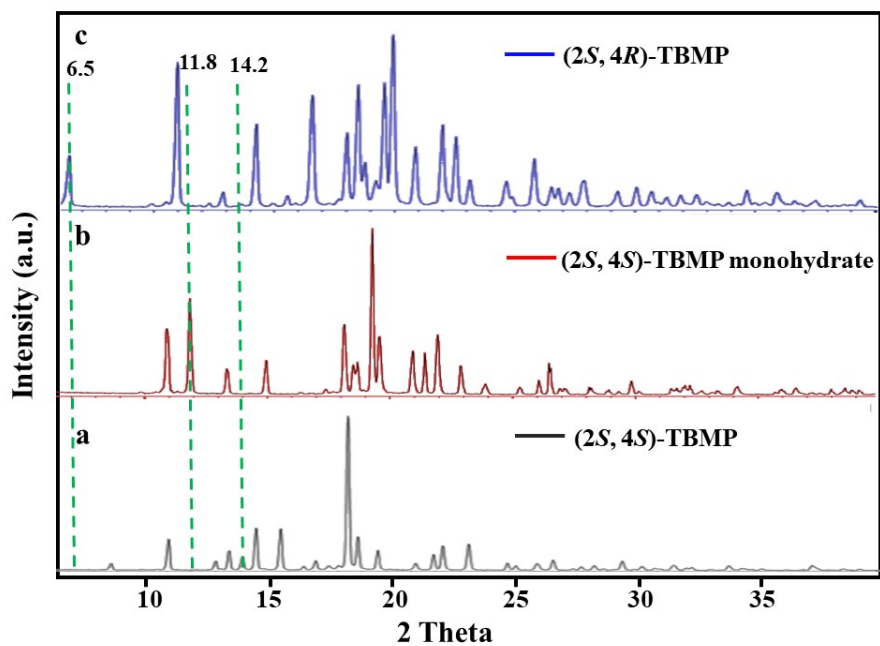

Fig. 17 The XRD of (2S, 4S)-TBMP, (2S, 4S)-TBMP monohydrate and (2S, 4R)-TBMP

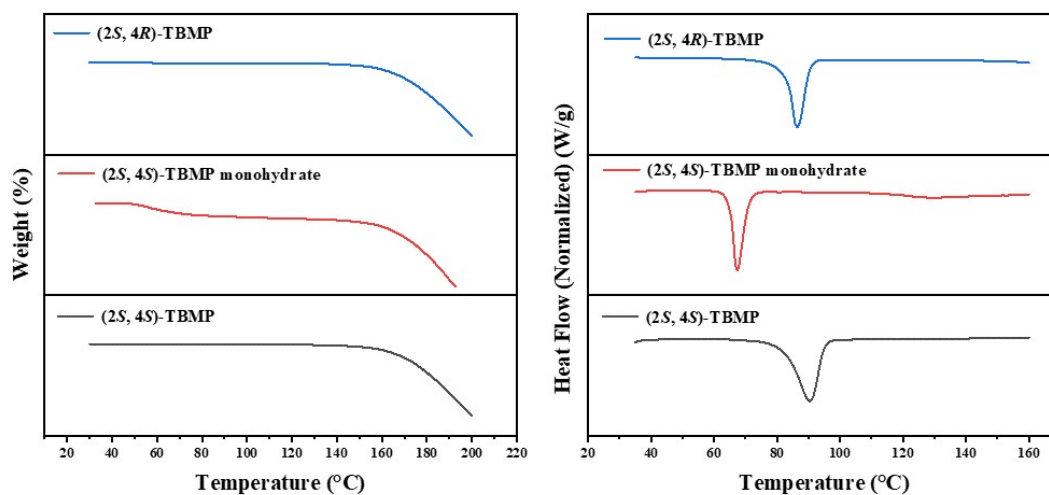

Fig. 18 A) TGA curves of (2S, 4S)-TBMP, (2S, 4S)-TBMP monohydrate and (2S, 4R)-TBMP

B) DSC curves of (2S, 4S)-TBMP, (2S, 4S)-TBMP monohydrate and (2S, 4R)-TBMP

**Table S2** Crystal and experiment data for Crystal 1 and Crystal 2

| Compound                             | Crystal 1                                                         | Crystal 2                                             |
|--------------------------------------|-------------------------------------------------------------------|-------------------------------------------------------|
| Formula                              | C <sub>12</sub> H <sub>21</sub> NO <sub>5</sub> ·H <sub>2</sub> O | C <sub>12</sub> H <sub>21</sub> NO <sub>5</sub>       |
| Formula weight                       | 277.31                                                            | 259.30                                                |
| Crystal system                       | Triclinic                                                         | Orthorhombic                                          |
| Space group                          | <i>P</i> 1                                                        | <i>P</i> 2 <sub>1</sub> 2 <sub>1</sub> 2 <sub>1</sub> |
| a (Å)                                | 5.8953(2)                                                         | 6.3761(8)                                             |
| b (Å)                                | 7.8109(2)                                                         | 9.9644(12)                                            |
| c (Å)                                | 8.5294(2)                                                         | 22.622(3)                                             |
| α (°)                                | 71.666(1)                                                         | 90.00                                                 |
| β (°)                                | 86.269(1)                                                         | 90.00                                                 |
| γ (°)                                | 86.169(1)                                                         | 90.00                                                 |
| V (Å <sup>3</sup> )                  | 371.586(18)                                                       | 1437.3(3)                                             |
| Z                                    | 1                                                                 | 4                                                     |
| D <sub>c</sub> (Mg·m <sup>-3</sup> ) | 1.239                                                             | 1.198                                                 |
| T (K)                                | 170                                                               | 296                                                   |
| μ (mm <sup>-1</sup> )                | 0.832                                                             | 0.093                                                 |
| No. of reflns collected              | 2616                                                              | 3281                                                  |
| No. of unique reflns                 | 1308                                                              | 1914                                                  |
| S                                    | 1.089                                                             | 1.079                                                 |
| CCDC Number                          | 2275123                                                           | 2275122                                               |

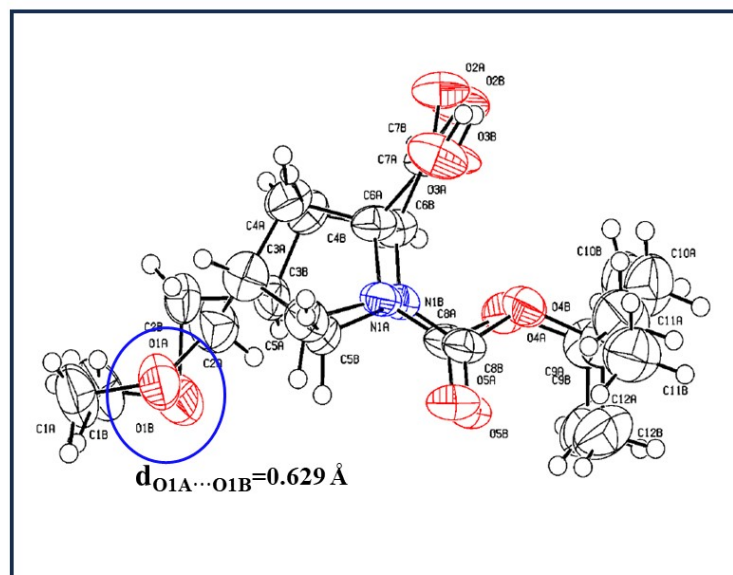**Fig. 19** The distance of (2*S*, 4*S*)-TBMP and (2*S*, 4*R*)-TBMP

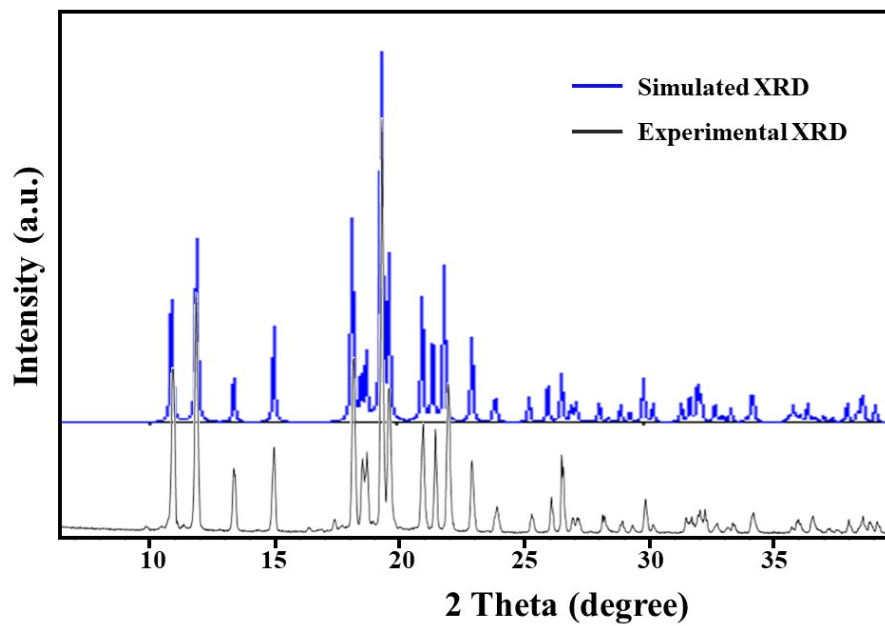

**Fig. 20** The XRD of simulated and experimental (2S, 4S)-TBMP monohydrate

**Table S3 : The new approach (First Pass CHEM21 green metrics toolkit)**

| Yield, AE, RME, MI/PMI and OE                                                              |              |                                                                                                                                                                                            |       |          |             |         |                                   |                  |                                                                                                                                                                                                                                                                                                                                                                                                                                                                                                                                                                                                                                                                                                            |               |                                    |                          |             |                 |                          |                |              |
|--------------------------------------------------------------------------------------------|--------------|--------------------------------------------------------------------------------------------------------------------------------------------------------------------------------------------|-------|----------|-------------|---------|-----------------------------------|------------------|------------------------------------------------------------------------------------------------------------------------------------------------------------------------------------------------------------------------------------------------------------------------------------------------------------------------------------------------------------------------------------------------------------------------------------------------------------------------------------------------------------------------------------------------------------------------------------------------------------------------------------------------------------------------------------------------------------|---------------|------------------------------------|--------------------------|-------------|-----------------|--------------------------|----------------|--------------|
| Reactant (Limiting Reactant first)                                                         | Mass(g)      | MW                                                                                                                                                                                         | Mol   | Catalyst | Mass(g)     | Reagent | Mass(g)                           | Reaction solvent | Volume(cm <sup>3</sup> )                                                                                                                                                                                                                                                                                                                                                                                                                                                                                                                                                                                                                                                                                   | Density(g/ml) | Mass(g)                            | Work up chemical         | Mass(g)     | Work up solvent | Volume(cm <sup>3</sup> ) | Density (g/ml) | Mass(g)      |
| TBMP                                                                                       | 20.00        | 259.30                                                                                                                                                                                     | 0.077 |          |             |         |                                   | H <sub>2</sub> O | 118.80                                                                                                                                                                                                                                                                                                                                                                                                                                                                                                                                                                                                                                                                                                     | 1.00          | 118.80                             | (2S,4S)-TBMP monohydrate | 0.06        | water           | 30.00                    | 1.00           | 30.00        |
| H <sub>2</sub> O                                                                           | 1.20         | 18.00                                                                                                                                                                                      | 0.067 |          |             |         |                                   |                  |                                                                                                                                                                                                                                                                                                                                                                                                                                                                                                                                                                                                                                                                                                            |               |                                    |                          |             |                 |                          |                |              |
| <b>Total</b>                                                                               | <b>21.20</b> | <b>277.30</b>                                                                                                                                                                              |       |          | <b>0.00</b> |         | <b>0.00</b>                       |                  |                                                                                                                                                                                                                                                                                                                                                                                                                                                                                                                                                                                                                                                                                                            |               | <b>118.80</b>                      |                          | <b>0.06</b> |                 |                          |                | <b>30.00</b> |
|                                                                                            |              |                                                                                                                                                                                            |       |          |             |         | <b>Yield</b>                      | 87.70            | Flag                                                                                                                                                                                                                                                                                                                                                                                                                                                                                                                                                                                                                                                                                                       | ●             | 87.70                              |                          |             |                 |                          |                |              |
|                                                                                            |              |                                                                                                                                                                                            |       |          |             |         | <b>Conversion</b>                 | 100.00           | ●                                                                                                                                                                                                                                                                                                                                                                                                                                                                                                                                                                                                                                                                                                          | 100.00        |                                    |                          |             |                 |                          |                |              |
|                                                                                            |              |                                                                                                                                                                                            |       |          |             |         | <b>Selectivity</b>                | 87.70            | ●                                                                                                                                                                                                                                                                                                                                                                                                                                                                                                                                                                                                                                                                                                          | 87.70         |                                    |                          |             |                 |                          |                |              |
|                                                                                            |              |                                                                                                                                                                                            |       |          |             |         | <b>AE</b>                         | 93.51            |                                                                                                                                                                                                                                                                                                                                                                                                                                                                                                                                                                                                                                                                                                            |               |                                    |                          |             |                 |                          |                |              |
|                                                                                            |              |                                                                                                                                                                                            |       |          |             |         | <b>RME</b>                        | 71.51            | <b>OE</b>                                                                                                                                                                                                                                                                                                                                                                                                                                                                                                                                                                                                                                                                                                  | 76.47         | <b>Product</b>                     |                          | <b>Mass</b> | <b>Mw</b>       | <b>Mol</b>               |                |              |
|                                                                                            |              |                                                                                                                                                                                            |       |          |             |         | <b>PMI total</b>                  | 11.22            | <b>E<sub>m</sub></b>                                                                                                                                                                                                                                                                                                                                                                                                                                                                                                                                                                                                                                                                                       | -0.99         | <b>Unreacted limiting reactant</b> |                          | <b>Mass</b> |                 |                          |                |              |
|                                                                                            |              |                                                                                                                                                                                            |       |          |             |         | PMI Reaction                      | 9.23             |                                                                                                                                                                                                                                                                                                                                                                                                                                                                                                                                                                                                                                                                                                            |               |                                    |                          |             |                 |                          |                |              |
|                                                                                            |              |                                                                                                                                                                                            |       |          |             |         | PMI reactants, reagents, catalyst | 1.40             |                                                                                                                                                                                                                                                                                                                                                                                                                                                                                                                                                                                                                                                                                                            |               |                                    |                          |             |                 |                          |                |              |
|                                                                                            |              |                                                                                                                                                                                            |       |          |             |         | PMI solvents                      | 7.84             |                                                                                                                                                                                                                                                                                                                                                                                                                                                                                                                                                                                                                                                                                                            |               |                                    |                          |             |                 |                          |                |              |
|                                                                                            |              |                                                                                                                                                                                            |       |          |             |         | PMI Workup                        | 1.98             |                                                                                                                                                                                                                                                                                                                                                                                                                                                                                                                                                                                                                                                                                                            |               |                                    |                          |             |                 |                          |                |              |
|                                                                                            |              |                                                                                                                                                                                            |       |          |             |         | PMI Workup chemical               | 0.00             |                                                                                                                                                                                                                                                                                                                                                                                                                                                                                                                                                                                                                                                                                                            |               |                                    |                          |             |                 |                          |                |              |
|                                                                                            |              |                                                                                                                                                                                            |       |          |             |         | PMI Workup solvents               | 1.98             |                                                                                                                                                                                                                                                                                                                                                                                                                                                                                                                                                                                                                                                                                                            |               |                                    |                          |             |                 |                          |                |              |
| <b>Solvents(First Pass)</b>                                                                |              |                                                                                                                                                                                            |       |          |             |         | <b>List solvents below</b>        |                  | <b>Experimental:</b> In a 100 ml flask, 20.00 g of TBMP (de: 71.94%) was combined with 40 ml of water. The mixture was gently heated to a temperature range of 55-65 °C, allowing for melting. Gradually reduce the temperature to a range of 20-40 °C. Introduce 0.02 g pure monohydrate crystal seeds and allow incubation for 1-3 hours. Further cooling was carried out to reach a temperature of 0-10 °C. The resulting mixture was stirred for a duration of 1 hour. After this, the mixture was subjected to filtration, washed with 10 mL of water, and room temperature volatile drying, yielding 18.65 g of TBMP monohydrate, inclusive of 17.50 g of anhydrous TBMP (de: 88.80%). <sup>42</sup> |               |                                    |                          |             |                 |                          |                |              |
| Preferred solvents                                                                         |              | water, EtOH, nBuOH, AcOipr, AcOnBu, PhOMe, MeOH, tBuOH, BnOH, ethylene glycol, acetone, MEK, MIBK, AcOEt, sulfolane                                                                        |       |          |             |         | water                             |                  | A subsequent step involved taking 40 ml of water and 18.65 g of the product and placing it in a 100 ml flask. This was similarly heated to a range of 55-65 °C to enable melting. Gradually reduce the temperature to a range of 20-40 °C. Introduce 0.02 g pure monohydrate crystal seeds and allow incubation for 1-3 hours. Further cooling to 0-10 °C was performed, and the mixture was kept warm while being stirred for 1 hour. This mixture, too, underwent filtration, washed with 10 mL of water, and room temperature volatile drying, providing 16.86 g of TBMP monohydrate, consisting of 15.76 g of anhydrous TBMP (de: 98.70%). <sup>42</sup>                                               |               |                                    |                          |             |                 |                          |                |              |
| Problematic solvents: (acceptable only if substitution does not offer advantages)          |              | DMSO, cyclohexanone, DMPU, AcOH, Ac <sub>2</sub> O, Acetonitrile, AcOMe, THF, heptane, Methylcyclohexane, toluene, xylene, MTBE, cyclohexane, chlorobenzene, formic acid, pyridine, Me-THF |       |          |             |         |                                   |                  | Subsequently, an additional 40 ml of water and 16.86 g of the product were placed in a 100 ml flask. This was also subjected to the same heating and cooling procedures. After reaching a temperature of 0-10 °C and stirring for 1-3 hours, filtration, washed with 10 mL of water, and room temperature volatile drying were employed to yield 16.21 g of TBMP monohydrate. The monohydrate was subjected to initial evaporation at room temperature for a period of 5-10 hours, followed by vacuum drying in the temperature range of 30-50 °C for another 5-10 hours, ultimately resulting in the isolation of 15.16 g of anhydrous (2S, 4S)-TBMP (de:99.80%). <sup>42</sup>                           |               |                                    |                          |             |                 |                          |                |              |
| Hazardous solvents: These solvents have significant health and/or safety concerns.         |              | dioxane, pentane, TEA, diisopropyl ether, DME, DCM, DMF, DMA, NMP, methoxyethanol, hexanewater                                                                                             |       |          |             |         |                                   |                  |                                                                                                                                                                                                                                                                                                                                                                                                                                                                                                                                                                                                                                                                                                            |               |                                    |                          |             |                 |                          |                |              |
| Highly hazardous solvents: The solvents which are agreed not to be used, even in screening |              | Et <sub>2</sub> O, Benzene, CCl <sub>4</sub> , chloroform, DCE, nitromethane, CS <sub>2</sub> , HMPA                                                                                       |       |          |             |         |                                   |                  |                                                                                                                                                                                                                                                                                                                                                                                                                                                                                                                                                                                                                                                                                                            |               |                                    |                          |             |                 |                          |                |              |

$$RME = \frac{\text{mass of isolated product}}{\text{total mass of reactants}} \times 100$$

$$AE = \frac{\text{molecular weight of product}}{\text{total molecular weight of reactants}} \times 100$$

$$\text{mass intensity} = \frac{\text{total mass in a process or process step}}{\text{mass of product}}$$

$$OE = \frac{RME}{AE} \times 100$$

| Critical elements |             |              |
|-------------------|-------------|--------------|
| Supply remaining  | Flga colour | Note element |
| 5-50 years        | Red flag    |              |
| 50-500 years      | Amber flag  |              |
| + 500 years       | Green flag  |              |

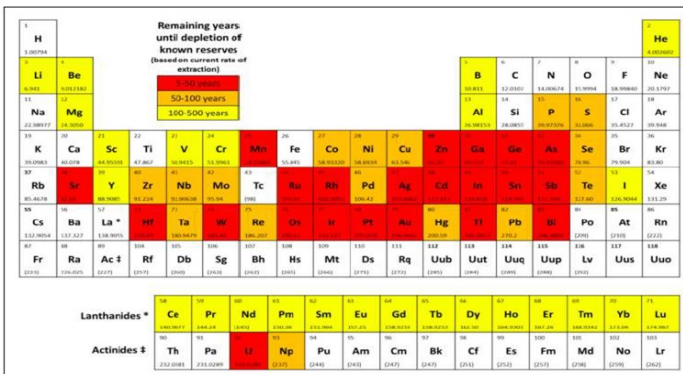

| Energy(First pass)                           |            | Tick |
|----------------------------------------------|------------|------|
| Reaction run between 0 to 70°C               | Green flag | x    |
| Reaction run between -20 to 0 or 70 to 140°C | Amber flag |      |
| Reaction run below -20 or ab 140°C           | Red flag   |      |

  

| Batch/flow | Flga colour | Tick |
|------------|-------------|------|
| Flow       | Green flag  |      |
| Batch      | Amber flag  | x    |

|                                                          |            |      |
|----------------------------------------------------------|------------|------|
| Reaction run at reflux                                   | Red flag   | Tick |
| Reaction run 5°C or more below the solvent boiling point | Green flag | x    |

  

| Work up                                                                               |            | list |
|---------------------------------------------------------------------------------------|------------|------|
| quenching                                                                             | Green flag | x    |
| filtration                                                                            |            |      |
| centrifugation                                                                        |            |      |
| crystallisation                                                                       |            |      |
| low temperature distillation/evaporation/sublimation(<140 °C at atmospheric pressure) |            |      |
| solvent exchange, quenching into aqueous solvent                                      | Amber flag |      |
| chromatography/ion exchange                                                           | Red flag   |      |
| high temperature                                                                      |            |      |
| multiple recrystallisation                                                            |            |      |

| Health & safety                                                                      |                               |                              |                                                            |                             |                        |                        |
|--------------------------------------------------------------------------------------|-------------------------------|------------------------------|------------------------------------------------------------|-----------------------------|------------------------|------------------------|
|                                                                                      | Red Flag                      | Amber Flag                   | Green Flag                                                 | List substances and H-codes | List substances and H- | List substances and H- |
| Highly explosive                                                                     | H200, H201, H202, H203        | H205, H220, H224             | If no red or amber flagged H codes present then green flag |                             |                        | x                      |
| Explosive thermal runaway                                                            | H230, H240, H250              | H241                         |                                                            |                             |                        |                        |
| Toxic                                                                                | H300, H310, H330              | H301, H311, H331             |                                                            |                             |                        |                        |
| Long Term toxicity                                                                   | H340, H350, H3560, H370, H372 | H341, H351, H361, H371, H373 |                                                            |                             |                        |                        |
| Environmental implications                                                           | H400, H410, H411, H420        | H401, H412                   |                                                            |                             |                        |                        |
| Use of chemicals of environmental concern                                            |                               |                              |                                                            |                             |                        |                        |
| chemical identified as Substances of Very High Concern by ChemSec which are utilised | Red flag                      |                              | List substances and H-codes                                | none                        |                        |                        |

**Table S4 : The original approach (First Pass CHEM21 green metrics toolkit)**

| Yield, AE, RME, MI/PMI and OE                                                              |                                                                                                                                                                |               |       |          |             |         |              |                                   |                          |                                                                                                                                                                                                                                                                                                                                                                                                                                                                                                                                                                                                                                                                                                                                                                                                                                                                                                                                                                                                                                                                                                                                                                                                                                                                                                                                                                                                                                                                                                                                                                                                                                                                             |               |                                 |             |                         |                           |               |              |  |  |  |  |  |  |
|--------------------------------------------------------------------------------------------|----------------------------------------------------------------------------------------------------------------------------------------------------------------|---------------|-------|----------|-------------|---------|--------------|-----------------------------------|--------------------------|-----------------------------------------------------------------------------------------------------------------------------------------------------------------------------------------------------------------------------------------------------------------------------------------------------------------------------------------------------------------------------------------------------------------------------------------------------------------------------------------------------------------------------------------------------------------------------------------------------------------------------------------------------------------------------------------------------------------------------------------------------------------------------------------------------------------------------------------------------------------------------------------------------------------------------------------------------------------------------------------------------------------------------------------------------------------------------------------------------------------------------------------------------------------------------------------------------------------------------------------------------------------------------------------------------------------------------------------------------------------------------------------------------------------------------------------------------------------------------------------------------------------------------------------------------------------------------------------------------------------------------------------------------------------------------|---------------|---------------------------------|-------------|-------------------------|---------------------------|---------------|--------------|--|--|--|--|--|--|
| Reactant (Limiting Reactant first)                                                         | Mass(g)                                                                                                                                                        | MW            | Mol   | Catalyst | Mass(g)     | Reagent | Mass(g)      | Reaction solvent                  | Volume(cm <sup>3</sup> ) | Density(g/ml)                                                                                                                                                                                                                                                                                                                                                                                                                                                                                                                                                                                                                                                                                                                                                                                                                                                                                                                                                                                                                                                                                                                                                                                                                                                                                                                                                                                                                                                                                                                                                                                                                                                               | Mass(g)       | Work up chemical                | Mass(g)     | Work up solvent         | Volume (cm <sup>3</sup> ) | Density(g/ml) | Mass(g)      |  |  |  |  |  |  |
| TBMP                                                                                       | 15.20                                                                                                                                                          | 259.30        | 0.059 |          |             |         |              | tert-Butyl methyl ether           | 270.00                   | 0.74                                                                                                                                                                                                                                                                                                                                                                                                                                                                                                                                                                                                                                                                                                                                                                                                                                                                                                                                                                                                                                                                                                                                                                                                                                                                                                                                                                                                                                                                                                                                                                                                                                                                        | 199.80        | Na <sub>2</sub> SO <sub>4</sub> | 1.60        | tert-Butyl methyl ether | 60.00                     | 0.74          | 44.40        |  |  |  |  |  |  |
| Dicyclohexylamine                                                                          | 8.77                                                                                                                                                           | 181.32        | 0.048 |          |             |         |              | H <sub>2</sub> O                  | 80.58                    | 1.00                                                                                                                                                                                                                                                                                                                                                                                                                                                                                                                                                                                                                                                                                                                                                                                                                                                                                                                                                                                                                                                                                                                                                                                                                                                                                                                                                                                                                                                                                                                                                                                                                                                                        | 80.58         |                                 |             |                         |                           |               |              |  |  |  |  |  |  |
| NaOH                                                                                       | 1.76                                                                                                                                                           | 40.00         | 0.044 |          |             |         |              | Dichloromethane                   | 5.00                     | 1.33                                                                                                                                                                                                                                                                                                                                                                                                                                                                                                                                                                                                                                                                                                                                                                                                                                                                                                                                                                                                                                                                                                                                                                                                                                                                                                                                                                                                                                                                                                                                                                                                                                                                        | 6.65          |                                 |             |                         |                           |               |              |  |  |  |  |  |  |
| Hydrochloric acid                                                                          | 5.58                                                                                                                                                           | 36.46         | 0.153 |          |             |         |              | Heptane                           | 25.00                    | 0.68                                                                                                                                                                                                                                                                                                                                                                                                                                                                                                                                                                                                                                                                                                                                                                                                                                                                                                                                                                                                                                                                                                                                                                                                                                                                                                                                                                                                                                                                                                                                                                                                                                                                        | 17.00         |                                 |             |                         |                           |               |              |  |  |  |  |  |  |
| <b>Total</b>                                                                               | <b>31.31</b>                                                                                                                                                   | <b>517.08</b> |       |          | <b>0.00</b> |         | <b>0.00</b>  |                                   |                          |                                                                                                                                                                                                                                                                                                                                                                                                                                                                                                                                                                                                                                                                                                                                                                                                                                                                                                                                                                                                                                                                                                                                                                                                                                                                                                                                                                                                                                                                                                                                                                                                                                                                             | <b>304.03</b> |                                 | <b>1.60</b> |                         |                           |               | <b>44.40</b> |  |  |  |  |  |  |
|                                                                                            |                                                                                                                                                                |               |       |          |             |         |              | Yield                             | 70.33                    | Flag                                                                                                                                                                                                                                                                                                                                                                                                                                                                                                                                                                                                                                                                                                                                                                                                                                                                                                                                                                                                                                                                                                                                                                                                                                                                                                                                                                                                                                                                                                                                                                                                                                                                        | 70.73         |                                 |             |                         |                           |               |              |  |  |  |  |  |  |
|                                                                                            |                                                                                                                                                                |               |       |          |             |         |              | Conversion                        | 100.00                   |                                                                                                                                                                                                                                                                                                                                                                                                                                                                                                                                                                                                                                                                                                                                                                                                                                                                                                                                                                                                                                                                                                                                                                                                                                                                                                                                                                                                                                                                                                                                                                                                                                                                             | 100.00        |                                 |             |                         |                           |               |              |  |  |  |  |  |  |
|                                                                                            |                                                                                                                                                                |               |       |          |             |         |              | Selectivity                       | 70.33                    |                                                                                                                                                                                                                                                                                                                                                                                                                                                                                                                                                                                                                                                                                                                                                                                                                                                                                                                                                                                                                                                                                                                                                                                                                                                                                                                                                                                                                                                                                                                                                                                                                                                                             | 70.73         |                                 |             |                         |                           |               |              |  |  |  |  |  |  |
|                                                                                            |                                                                                                                                                                |               |       |          |             |         |              | AE                                | 50.15                    |                                                                                                                                                                                                                                                                                                                                                                                                                                                                                                                                                                                                                                                                                                                                                                                                                                                                                                                                                                                                                                                                                                                                                                                                                                                                                                                                                                                                                                                                                                                                                                                                                                                                             |               |                                 |             |                         |                           |               |              |  |  |  |  |  |  |
|                                                                                            |                                                                                                                                                                |               |       |          |             |         |              | RME                               | 28.17                    | OE                                                                                                                                                                                                                                                                                                                                                                                                                                                                                                                                                                                                                                                                                                                                                                                                                                                                                                                                                                                                                                                                                                                                                                                                                                                                                                                                                                                                                                                                                                                                                                                                                                                                          | 56.17         |                                 |             |                         |                           |               |              |  |  |  |  |  |  |
|                                                                                            |                                                                                                                                                                |               |       |          |             |         |              | PMI total                         | 43.24                    | Em                                                                                                                                                                                                                                                                                                                                                                                                                                                                                                                                                                                                                                                                                                                                                                                                                                                                                                                                                                                                                                                                                                                                                                                                                                                                                                                                                                                                                                                                                                                                                                                                                                                                          | -0.96         |                                 |             |                         |                           |               |              |  |  |  |  |  |  |
|                                                                                            |                                                                                                                                                                |               |       |          |             |         |              | PMI Reaction                      | 38.02                    |                                                                                                                                                                                                                                                                                                                                                                                                                                                                                                                                                                                                                                                                                                                                                                                                                                                                                                                                                                                                                                                                                                                                                                                                                                                                                                                                                                                                                                                                                                                                                                                                                                                                             |               |                                 |             |                         |                           |               |              |  |  |  |  |  |  |
|                                                                                            |                                                                                                                                                                |               |       |          |             |         |              | PMI reactants, reagents, catalyst | 3.55                     |                                                                                                                                                                                                                                                                                                                                                                                                                                                                                                                                                                                                                                                                                                                                                                                                                                                                                                                                                                                                                                                                                                                                                                                                                                                                                                                                                                                                                                                                                                                                                                                                                                                                             |               |                                 |             |                         |                           |               |              |  |  |  |  |  |  |
|                                                                                            |                                                                                                                                                                |               |       |          |             |         |              | PMI solvents                      | 34.47                    |                                                                                                                                                                                                                                                                                                                                                                                                                                                                                                                                                                                                                                                                                                                                                                                                                                                                                                                                                                                                                                                                                                                                                                                                                                                                                                                                                                                                                                                                                                                                                                                                                                                                             |               |                                 |             |                         |                           |               |              |  |  |  |  |  |  |
|                                                                                            |                                                                                                                                                                |               |       |          |             |         |              | PMI Workup                        | 5.22                     |                                                                                                                                                                                                                                                                                                                                                                                                                                                                                                                                                                                                                                                                                                                                                                                                                                                                                                                                                                                                                                                                                                                                                                                                                                                                                                                                                                                                                                                                                                                                                                                                                                                                             |               |                                 |             |                         |                           |               |              |  |  |  |  |  |  |
| PMI Workup chemical                                                                        | 0.18                                                                                                                                                           |               |       |          |             |         |              |                                   |                          |                                                                                                                                                                                                                                                                                                                                                                                                                                                                                                                                                                                                                                                                                                                                                                                                                                                                                                                                                                                                                                                                                                                                                                                                                                                                                                                                                                                                                                                                                                                                                                                                                                                                             |               |                                 |             |                         |                           |               |              |  |  |  |  |  |  |
| PMI Workup solvents                                                                        | 5.03                                                                                                                                                           |               |       |          |             |         |              |                                   |                          |                                                                                                                                                                                                                                                                                                                                                                                                                                                                                                                                                                                                                                                                                                                                                                                                                                                                                                                                                                                                                                                                                                                                                                                                                                                                                                                                                                                                                                                                                                                                                                                                                                                                             |               |                                 |             |                         |                           |               |              |  |  |  |  |  |  |
| <b>Solvents(First Pass)</b>                                                                |                                                                                                                                                                |               |       |          |             |         |              | <b>List solvents below</b>        |                          |                                                                                                                                                                                                                                                                                                                                                                                                                                                                                                                                                                                                                                                                                                                                                                                                                                                                                                                                                                                                                                                                                                                                                                                                                                                                                                                                                                                                                                                                                                                                                                                                                                                                             |               |                                 |             |                         |                           |               |              |  |  |  |  |  |  |
| Preferred solvents                                                                         | water, EtOH, nBuOH, AcOipr, AcOnBu, PhOMe, MeOH, tBuOH, BnOH, ethylene glycol, acetone, MEK, MIBK, AcOEt, sulfolane                                            |               |       |          |             |         | water        |                                   |                          | <p><b>Experimental:</b> 15.20 g of TBMP (de: 65%) were combined with 120 mL of methyl tert-butyl ether (TBME) and 8.77 g of dicyclohexylamine. The mixture was gently heated to 60 °C. After 3 hours, the resulting precipitated solid was allowed to cool slowly to 20 °C and was subsequently stirred overnight. The solid was then separated by filtration, washed with 30 mL of TBME, and carefully dried, yielding 16.00 g of a nearly white solid with a diastereomeric excess of 94%.<sup>61</sup></p> <p>For the next step, 16.00 g of the obtained material was combined with 75 mL of water and 75 mL of MTBE. To this mixture, 1.76g of sodium hydroxide was added. After stirring for 20 minutes, the solution was separated, and the aqueous phase was collected. An additional 75 mL of methyl <i>tert</i>-butyl ether was added, and the mixture was stirred with 5.58 g of hydrochloric acid and 5.58 g of water. The solution was then separated again. The aqueous phase was subjected to another extraction with 30 mL of methyl tert-butyl ether, and the organic phases were combined. To remove any remaining moisture, 1.60 g of anhydrous sodium sulfate was stirred into the combined organic phase for 1 hour, followed by a spinning-dry process, resulting in a final yield of 9.10 g.<sup>61</sup></p> <p>In the final step, 16.79 g of hexane and 6.71 g of dichloromethane were heated to 60 °C. 9.10 g of the TBMP were dissolved until the solution was clear. Upon cooling to 5-10 °C, a solid precipitated out, which was subsequently filtered and dried, yielding 9.00 g of TBMP (de: 96%, 8.82 g pure (2S,4S)-TBMP).<sup>61</sup></p> |               |                                 |             |                         |                           |               |              |  |  |  |  |  |  |
| Problematic solvents: (acceptable only if substitution does not offer advantages)          | DMSO, cyclohexanone, DMPU, AcOH, Ac <sub>2</sub> O, Acetonitrile, AcOMe, THF, toluene, xylene, MTBE, cyclohexane, chlorobenzene, formic acid, pyridine, Me-THF |               |       |          |             |         | MTBE         |                                   |                          |                                                                                                                                                                                                                                                                                                                                                                                                                                                                                                                                                                                                                                                                                                                                                                                                                                                                                                                                                                                                                                                                                                                                                                                                                                                                                                                                                                                                                                                                                                                                                                                                                                                                             |               |                                 |             |                         |                           |               |              |  |  |  |  |  |  |
| Hazardous solvents: These solvents have significant health and/or safety concerns.         | dioxane, pentane, TEA, diisopropyl ether, DME, DCM, DMF, DMA, NMP, methoxyethanol, hexanewater                                                                 |               |       |          |             |         | DCM, pentane |                                   |                          |                                                                                                                                                                                                                                                                                                                                                                                                                                                                                                                                                                                                                                                                                                                                                                                                                                                                                                                                                                                                                                                                                                                                                                                                                                                                                                                                                                                                                                                                                                                                                                                                                                                                             |               |                                 |             |                         |                           |               |              |  |  |  |  |  |  |
| Highly hazardous solvents: The solvents which are agreed not to be used, even in screening | Et <sub>2</sub> O, Benzene, CCl <sub>4</sub> , chloroform, DCE, nitromethane, CS <sub>2</sub> , HMPA                                                           |               |       |          |             |         |              |                                   |                          |                                                                                                                                                                                                                                                                                                                                                                                                                                                                                                                                                                                                                                                                                                                                                                                                                                                                                                                                                                                                                                                                                                                                                                                                                                                                                                                                                                                                                                                                                                                                                                                                                                                                             |               |                                 |             |                         |                           |               |              |  |  |  |  |  |  |







| Critical elements |             |              |
|-------------------|-------------|--------------|
| Supply remaining  | Flga colour | Note element |
| 5-50 years        | Red flag    |              |
| 50-500 years      | Amber flag  |              |
| + 500 years       | Green flag  |              |

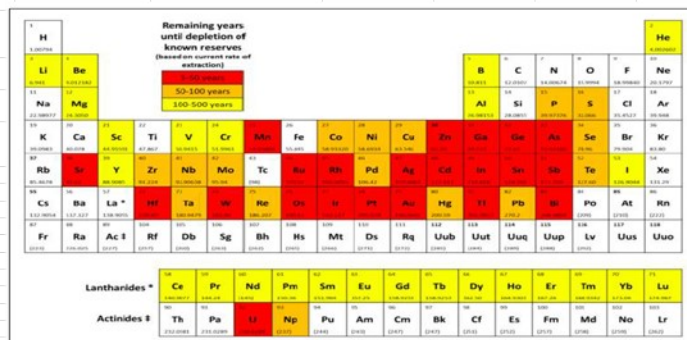

| Energy(Third pass)                           |            | Tick |
|----------------------------------------------|------------|------|
| Reaction run between 0 to 70°C               | Green flag | x    |
| Reaction run between -20 to 0 or 70 to 140°C | Amber flag |      |
| Reaction run below -20 or ab 140°C           | Red flag   |      |

| Reaction run at reflux                                   | Red flag   | Tick |
|----------------------------------------------------------|------------|------|
| Reaction run 5°C or more below the solvent boiling point | Green flag | x    |

| Batch/flow | Flga colour | Tick |
|------------|-------------|------|
| Flow       | Green flag  |      |
| Batch      | Amber flag  | x    |

| Work up                                                               |            | list |
|-----------------------------------------------------------------------|------------|------|
| quenching                                                             | Green flag | x    |
| filtration                                                            |            |      |
| centrifugation                                                        |            |      |
| crystallisation                                                       |            |      |
| distillation/evaporation/sublimation(<140 °C at atmospheric pressure) | Amber flag |      |
| solvent exchange, quenching into aqueous solvent                      | Amber flag |      |
| chromatography/ion exchange                                           | Red flag   |      |
| high temperature                                                      | Red flag   |      |
| multiple recrystallisation                                            | Red flag   |      |

| Health & safety            | Red Flag                      | Amber Flag                   | Green Flag                                                 | List substances and H-codes | List substances and H- | List substances and H- |
|----------------------------|-------------------------------|------------------------------|------------------------------------------------------------|-----------------------------|------------------------|------------------------|
| Highly explosive           | H200, H201, H202, H203        | H205, H220, H224             | If no red or amber flagged H codes present then green flag |                             |                        | x                      |
| Explosive thermal runaway  | H230, H240, H250              | H241                         |                                                            |                             |                        |                        |
| Toxic                      | H300, H310, H330              | H301, H311, H331             |                                                            |                             |                        |                        |
| Long Term toxicity         | H340, H350, H3500, H370, H372 | H341, H351, H361, H371, H373 |                                                            |                             |                        |                        |
| Environmental implications | H400, H410, H411, H420        | H401, H412                   |                                                            |                             |                        |                        |

| Use of chemicals of environmental concern                                            | Red flag | List substances and H-codes |
|--------------------------------------------------------------------------------------|----------|-----------------------------|
| chemical identified as Substances of Very High Concern by ChemSec which are utilised | Red flag | none                        |
