# Supplementary material for: Design and process study of chiral separation of (2S,4S)-1-(tert-butoxy carbonyl)-4-(methoxymethyl) pyrrolidine-2-carboxylic acid for green manufacturing
Source: Royal Society of Chemistry journal article supplement (doi:10.1039/d3gc04435a), 2024-01-01
Supplement: d3gc04435a2.xlsx [file d3gc04435a2.xlsx]

## Sheet: Table S3
Yield, AE, RME, MI/PMI and OE
Reactant (Umiting Reactant first)	Mass(g)	MW	Mol	Catalyst	Mass(g)	Reagent	Mass(g)	Reaction solvent	Volume(cm3)	Density(g/ml)	Mass(g)	Work up chemical	Mass(g)	Work up solvent	Volume(cm3)	Density(g/ml)	Mass(g)
TBMP	20	259.3	0.0771307					H2O	118.8	1	118.8	(2S,4S)-TBMP monohydrate	0.06	water	30	1	30
H2O	1.2	18	0.0666667
Total	21.2	277.3			0		0				118.8		0.06				30
									Flag
							Yield	87.6976	87.7
							Conversion	100	100
							Selectivity	87.6976	87.7					Mass	Mw	Mol
							AE	93.5088				Product		15.16	259.3	0.0584651
							RME	71.5094	OE	76.4735				Mass
							PMI toal	11.2177	Em	-0.986016		Unreacted limiting reactant
							PMI Reaction	9.23483
							PMI reactants, reagents, catalyst	1.39842
							PMI solvents	7.83641
							PMI Workup	1.98285
							PMI Workup chemical	0.00395778
							PMI Workup solvents	1.97889
Solvents(First Pass)							List solvents below
Preferred solvents		water, EtOH, nBuOH, AcOipr, AcOnBu, PhOMe, MeOH, tBuOH, BnOH, ethylene glycol, acetone, MEK, MIBK, AcOEt, sulfolane					water
Problematic solvents: (acceptable only if substitution does not offer advantages)		DMSO, cyclohexanone, DMPU, AcOH, Ac2O, Acetonitrile, AcOMe, THF, heptane, Mecyclohexane, toluene, xylene, MTBE, cyclohexane, chlorobenzene, formic acid, pyridine, Me-THF
Hazardous solvents: These solvents have significant health and/or safety concerns.		dioxane, pentane, TEA, diisopropyl ether, DME, DCM, DMF, DMA, NMP, methoxyethanol, hexanewater
Highly hazardous solvents: The solvents which are agreed not to be used, even in screening		Et2O, Benzene, CCl4, chloroform, DCE, nitromethane, CS2, HMPA
Catalyst/enzyme (First Pass)				Tick						Tick
Catalyst or enzyme used, or reaction takes place without any catalyst/reagents.			Green flag	x		Facile recovery of catalyst/enzyme			Green flag	x
Use of stoichiometric quantities of reagents			Amber flag			catalyst/enzyme not recovered			Amber flag
Use of reagents in excess			Red flag
Critical elements
Supply remaining	Flga colour	Note element
5-50 years	Red flag
50-500 years	Amber flag
﹢500 years	Green flag
Energy(First pass)			Tick						Tick
Reaction run between 0 to 70°C		Green flag	x		Reaction run at reflux			Red flag
Reaction run between -20 to 0 or 70 to 140°C		Amber flag			Reaction run 5°C or more below the solvent boiling point			Green flag	x
Reaction run below -20 or ab 140°C		Red flag
Batch/flow	Flga colour		Tick		Work up				list
Flow	Green flag				quenching			Green flag	x
Batch	Amber flag		x		filtration
					centrifugation
					crystallisation
					low temperature distillation/evaporation/sublimation((<140 °C at atmospheric pressure)
					solvent exchange, quenching into aqueous solvent			Amber flag
					chromatograhy/ion exchange			Red flag
					high temperature
					multiple recrystallisation
Health & safety
	Red Flag		Amber Flag		Green Flag		List substances and H-codes		List substances and H-codes		List substances and H-codes
Highly explosvie	H200, H201, H202, H203		H205, H220, H224		If no red or amber flagged H codes present then green flag						x
Explosive thermal runaway	H230, H240, H250		H241
Toxic	H300, H310, H330		H301, H311, H331
Long Term toxicity	H340, H350, H3560, H370, H372		H341, H351, H361, H371, H373
Environmental implications	H400, H410, H411, H420		H401, H412
Use of chemicals of environmental concern					List substances and H-codes
chemical identified as Substances of Very High Concern by ChemSec which are utilised				Red flag	none

## Sheet: Table S4
Yield, AE, RME, MI/PMI and OE
Reactant (Umiting Reactant first)	Mass(g)	MW	Mol	Catalyst	Mass(g)	Reagent	Mass(g)	Reaction solvent	Volume(cm3)	Density(g/ml)	Mass(g)	Work up chemical	Mass(g)	Work up solvent	Volume(cm3)	Density(g/ml)	Mass(g)
TBMP	15.2	259.3	0.0586194					tert-Butyl methyl ether	270	0.74	199.8	Na2SO4	1.6	tert-Butyl methyl ether	60	0.74	44.4
Dicyclohexylamine	8.77	181.32	0.0483675					H2O	80.58	1	80.58
NaOH	1.76	40	0.044					Dichloromethane	5	1.33	6.65
Hydrochloric acid	5.58	36.46	0.153044					Heptane	25	0.68	17
Total	31.31	517.08			0		0				304.03		1.6				44.4
									Flag
							Yield	70.3254	70.73
							Conversion	100	100
							Selectivity	70.3254	70.73					Mass	Mw	Mol
							AE	50.147				Product		8.82	259.3	0.0340147
							RME	28.1699	OE	56.1747				Mass
							PMI toal	43.2358	Em	-0.964501		Unreacted limiting reactant
							PMI Reaction	38.0204
							PMI reactants, reagents, catalyst	3.54989
							PMI solvents	34.4705
							PMI Workup	5.21542
							PMI Workup chemical	0.181406
							PMI Workup solvents	5.03401
Solvents(First Pass)							List solvents below
Preferred solvents		water, EtOH, nBuOH, AcOipr, AcOnBu, PhOMe, MeOH, tBuOH, BnOH, ethylene glycol, acetone, MEK, MIBK, AcOEt, sulfolane					water
Problematic solvents: (acceptable only if substitution does not offer advantages)		DMSO, cyclohexanone, DMPU, AcOH, Ac2O, Acetonitrile, AcOMe, THF, heptane, Mecyclohexane, toluene, xylene, MTBE, cyclohexane, chlorobenzene, formic acid, pyridine, Me-THF					MTBE
Hazardous solvents: These solvents have significant health and/or safety concerns.		dioxane, pentane, TEA, diisopropyl ether, DME, DCM, DMF, DMA, NMP, methoxyethanol, hexanewater					DCM, pentane
Highly hazardous solvents: The solvents which are agreed not to be used, even in screening		Et2O, Benzene, CCl4, chloroform, DCE, nitromethane, CS2, HMPA
Catalyst/enzyme (First Pass)				Tick						Tick
Catalyst or enzyme used, or reaction takes place without any catalyst/reagents.			Green flag	x		Facile recovery of catalyst/enzyme			Green flag	x
Use of stoichiometric quantities of reagents			Amber flag			catalyst/enzyme not recovered			Amber flag
Use of reagents in excess			Red flag
Critical elements
Supply remaining	Flga colour	Note element
5-50 years	Red flag
50-500 years	Amber flag
﹢500 years	Green flag
Energy(First pass)			Tick						Tick
Reaction run between 0 to 70°C		Green flag	x		Reaction run at reflux			Red flag
Reaction run between -20 to 0 or 70 to 140°C		Amber flag			Reaction run 5°C or more below the solvent boiling point			Green flag
Reaction run below -20 or ab 140°C		Red flag
Batch/flow	Flga colour		Tick		Work up				list
Flow	Green flag				quenching			Green flag
Batch	Amber flag		x		filtration
					centrifugation
					crystallisation
					low temperature distillation/evaporation/sublimation((<140 °C at atmospheric pressure)
					solvent exchange, quenching into aqueous solvent			Amber flag	x
					chromatograhy/ion exchange			Red flag
					high temperature
					multiple recrystallisation
Health & safety
	Red Flag		Amber Flag		Green Flag		List substances and H-codes		List substances and H-codes		List substances and H-codes
Highly explosvie	H200, H201, H202, H203		H205, H220, H224		If no red or amber flagged H codes present then green flag		dicyclohexylamine:H410 Heptane:H410		DCM:H351 Hydrochloric acid:H331		MTBE water
Explosive thermal runaway	H230, H240, H250		H241
Toxic	H300, H310, H330		H301, H311, H331
Long Term toxicity	H340, H350, H3560, H370, H372		H341, H351, H361, H371, H373
Environmental implications	H400, H410, H411, H420		H401, H412
Use of chemicals of environmental concern					List substances and H-codes
chemical identified as Substances of Very High Concern by ChemSec which are utilised				Red flag	none

## Sheet: Table S5
Yield, AE, RME, MI/PMI and OE
Reactant (Umiting Reactant first)	Mass(kg)	MW	Mol	Catalyst	Mass(kg)	Reagent	Mass(kg)	Reaction solvent	Volume(L3)	Density(g/ml)	Mass(kg)	Work up chemical	Mass(kg)	Work up solvent	Volume(L3)	Density(g/ml)	Mass(kg)
TBMP	200	259.3	0.771307					H2O	1188	1	1188	(2S,4S)-TBMP monohydrate	0.6	water	300	1	300
H2O	12	18	0.666667
Total	212	277.3			0		0				1188		0.6				300
									Flag
							Yield	91.9206	91.92
							Conversion	100	100
							Selectivity	91.9206	91.92					Mass(kg)	Mw	Mol
							AE	93.5088				Product		158.9	259.3	0.612804
							RME	74.9528	OE	80.1559				Mass
							PMI toal	10.7023	Em	-0.986658		Unreacted limiting reactant
							PMI Reaction	8.81057
							PMI reactants, reagents, catalyst	1.33417
							PMI solvents	7.4764
							PMI Workup	1.89176
							PMI Workup chemical	0.00377596
							PMI Workup solvents	1.88798
Solvents(Third Pass)							List solvents below
Preferred solvents		water, EtOH, nBuOH, AcOipr, AcOnBu, PhOMe, MeOH, tBuOH, BnOH, ethylene glycol, acetone, MEK, MIBK, AcOEt, sulfolane					water
Problematic solvents: (acceptable only if substitution does not offer advantages)		DMSO, cyclohexanone, DMPU, AcOH, Ac2O, Acetonitrile, AcOMe, THF, heptane, Mecyclohexane, toluene, xylene, MTBE, cyclohexane, chlorobenzene, formic acid, pyridine, Me-THF
Hazardous solvents: These solvents have significant health and/or safety concerns.		dioxane, pentane, TEA, diisopropyl ether, DME, DCM, DMF, DMA, NMP, methoxyethanol, hexanewater
Highly hazardous solvents: The solvents which are agreed not to be used, even in screening		Et2O, Benzene, CCl4, chloroform, DCE, nitromethane, CS2, HMPA
Catalyst/enzyme (Third Pass)				Tick						Tick
Catalyst or enzyme used, or reaction takes place without any catalyst/reagents.			Green flag	x		Facile recovery of catalyst/enzyme			Green flag	x
Use of stoichiometric quantities of reagents			Amber flag			catalyst/enzyme not recovered			Amber flag
Use of reagents in excess			Red flag
Critical elements
Supply remaining	Flga colour	Note element
5-50 years	Red flag
50-500 years	Amber flag
﹢500 years	Green flag
Energy(Third pass)			Tick						Tick
Reaction run between 0 to 70°C		Green flag	x		Reaction run at reflux			Red flag
Reaction run between -20 to 0 or 70 to 140°C		Amber flag			Reaction run 5°C or more below the solvent boiling point			Green flag	x
Reaction run below -20 or ab 140℃		Red flag
Batch/flow	Flga colour		Tick		Work up				list
Flow	Green flag				quenching			Green flag	x
Batch	Amber flag		x		filtration
					centrifugation
					crystallisation
					low temperature distillation/evaporation/sublimation((<140 °C at atmospheric pressure)
					solvent exchange, quenching into aqueous solvent			Amber flag
					chromatograhy/ion exchange			Red flag
					high temperature
					multiple recrystallisation
Health & safety
	Red Flag		Amber Flag		Green Flag		List substances and H-codes		List substances and H-codes		List substances and H-codes
Highly explosvie	H200, H201, H202, H203		H205, H220, H224		If no red or amber flagged H codes present then green flag						x
Explosive thermal runaway	H230, H240, H250		H241
Toxic	H300, H310, H330		H301, H311, H331
Long Term toxicity	H340, H350, H3560, H370, H372		H341, H351, H361, H371, H373
Environmental implications	H400, H410, H411, H420		H401, H412
Use of chemicals of environmental concern					List substances and H-codes
chemical identified as Substances of Very High Concern by ChemSec which are utilised				Red flag	none
